# Supplementary material for: Constraint-Based Modeling of Carbon Fixation and the Energetics of Electron Transfer in Geobacter metallireducens
Source: PLoS Comput Biol. 2014 Apr 24;10(4):e1003575. doi: 10.1371/journal.pcbi.1003575 (PMC3998878; doi:10.1371/journal.pcbi.1003575)
Supplement: Dataset S3 — The biomass objective function formulated for G. metallireducens and a table corresponding to changes which were made to the network based on functional testing using the biomass objective function. (XLSX) [file pcbi.1003575.s003.xlsx]

## Sheet: READ ME
	Worksheet	Notes
	biomass_WT
		this worksheet contains the spreadsheet used to determine the dry cell weight wild-type content based on macromolecular content. Thi data was used to form the wild-type biomass objective function (BOFwt). Each column is labeled for content.
	biomass_core
		this worksheet contains the work used to derive the core biomass objective function (BOFcore). This spreadsheet was baded of the biomass_WT spreadsheet and ORF essentiality data (see methods). Each column is labeled for content.
	maintenance
		contains the table used to calculate cellular maintenance costs and lists references where data was acquired
	soluble_pool
		contains tables and references used to determine the souable pool (cofactors, etc.) content
	ion
		contains tables and references used to determine the ion content
	murein
		contains tables and references used to determine the murein (cell wall) content
	lipids
		contains tables and references used to determine the lipid content
	DNA
		contains table to determine the DNA content
	macromolecular
		analysis of the macromolecular content used in the Biomass Objective Functions
	BOF_lists
		lists of the metabolites and qunatities in each of the BOFs
	functional_testing
		the BOF metabolites that could not initially be generated by the reconstructed network and the reactions and associated genes that were added to the network to satisfy these deficiencies.

## Sheet: biomass_WT
G. metallireducens WT Biomass Objective Function
	Notes	Macromolecule	overall wt%	composition (molar fraction)	mmol/gDW (Calc.)	metabolite	location	type	formula	C	H	N	O	P	S	MW (mg/mmol)	difference b/w metabolite and structual component	MWcorr (mg/mmol)	mg (if total 1 mmol)	total wt (mg)	composition (weight fraction)	g/gDW	mmol/gDW		total mmols material	class	final wt%		g/gDW	g/gDW	g/gDW		Reference
	Reactants																																NH	Neidhardt FC, Ingraham JL, Schaechter M (1990) Physiology of the bacterial cell : a molecular approach. Sinauer Associates, Sunderland, Mass.
	NH pg. 96	Protein	0.56	0.0960441	0.496489	ala-L	cytoplasm	AA	C3H7NO2	3	7	1	2	0	0	89.094	h2o	71.079	6.82672	108.33	0.0630178	0.03529	0.496489						0.0442342
	NH pg. 96			0.0553041	0.285888	arg-L	cytoplasm	AA	C6H15N4O2	6	15	4	2	0	0	175.212	h2o	157.197	8.69363		0.0802514	0.0449408	0.285888						0.0500911
	NH pg. 96			0.0450699	0.232984	asn-L	cytoplasm	AA	C4H8N2O3	4	8	2	3	0	0	132.119	h2o	114.104	5.14265		0.0474721	0.0265844	0.232984						0.0307816
	NH pg. 96			0.0450699	0.232984	asp-L	cytoplasm	AA	C4H6NO4	4	6	1	4	0	0	132.095	h2o	114.08	5.14157		0.0474621	0.0265788	0.232984						0.030776
	NH pg. 96			0.0171226	0.0885135	cys-L	cytoplasm	AA	C3H7NO2S	3	7	1	2	0	1	121.16	h2o	103.145	1.76611		0.0163031	0.00912972	0.0885135						0.0107243
	NH pg. 96			0.0492029	0.254349	gln-L	cytoplasm	AA	C5H10N2O3	5	10	2	3	0	0	146.146	h2o	128.131	6.30442		0.0581964	0.03259	0.254349						0.0371721
	NH pg. 96			0.0492029	0.254349	glu-L	cytoplasm	AA	C5H8NO4	5	8	1	4	0	0	146.122	h2o	128.107	6.30324		0.0581855	0.0325839	0.254349						0.037166
	NH pg. 96			0.114544	0.592125	gly	cytoplasm	AA	C2H5NO2	2	5	1	2	0	0	75.067	h2o	57.052	6.53499		0.0603248	0.0337819	0.592125						0.044449				consistency check		difference
	NH pg. 96			0.017713	0.0915657	his-L	cytoplasm	AA	C6H9N3O2	6	9	3	2	0	0	155.157	h2o	137.142	2.4292		0.0224241	0.0125575	0.0915657						0.0142071				reactants	42.4621	0.998897
	NH pg. 96			0.05432	0.280801	ile-L	cytoplasm	AA	C6H13NO2	6	13	1	2	0	0	131.175	h2o	113.16	6.14685		0.0567419	0.0317755	0.280801						0.0368341				products	41.4632
	NH pg. 96			0.0842354	0.435446	leu-L	cytoplasm	AA	C6H13NO2	6	13	1	2	0	0	131.175	h2o	113.16	9.53208		0.0879911	0.049275	0.435446						0.0571196				difference	0.998897
	NH pg. 96			0.0641606	0.331671	lys-L	cytoplasm	AA	C6H15N2O2	6	15	2	2	0	0	147.198	h2o	129.183	8.28846		0.0765112	0.0428463	0.331671						0.0488213
	NH pg. 96			0.0287345	0.14854	met-L	cytoplasm	AA	C5H11NO2S	5	11	1	2	0	1	149.214	h2o	131.199	3.76994		0.0348005	0.0194883	0.14854						0.0221642				maintenance
	NH pg. 96			0.0346389	0.179062	phe-L	cytoplasm	AA	C9H11NO2	9	11	1	2	0	0	165.192	h2o	147.177	5.09804		0.0470603	0.0263538	0.179062						0.0295796				reactants	41.2763
	NH pg. 96			0.0413304	0.213653	pro-L	cytoplasm	AA	C5H9NO2	5	9	1	2	0	0	115.132	h2o	97.117	4.01389		0.0370524	0.0207494	0.213653						0.0245983				products	41.2763
	NH pg. 96			0.0403464	0.208566	ser-L	cytoplasm	AA	C3H7NO3	3	7	1	3	0	0	105.093	h2o	87.078	3.51328		0.0324313	0.0181615	0.208566						0.0219189				difference	0
	NH pg. 96			0.0474316	0.245193	thr-L	cytoplasm	AA	C4H9NO3	4	9	1	3	0	0	119.12	h2o	101.105	4.79557		0.0442682	0.0247902	0.245193						0.0292073
	NH pg. 96			0.0106278	0.0549394	trp-L	cytoplasm	AA	C11H12N2O2	11	12	2	2	0	0	204.229	h2o	186.214	1.97905		0.0182687	0.0102305	0.0549394						0.0112202
	NH pg. 96			0.0257823	0.133279	tyr-L	cytoplasm	AA	C9H11NO3	9	11	1	3	0	0	181.191	h2o	163.176	4.20706		0.0388356	0.0217479	0.133279						0.0241489
	NH pg. 96			0.0791183	0.408993	val-L	cytoplasm	AA	C5H11NO2	5	11	1	2	0	0	117.148	h2o	99.133	7.84323		0.0724013	0.0405447	0.408993		5.16939	Protein	0.56		0.0479127	0.653127	0.56
	GC content for E. coli K-12mg1655 (50.8%)	DNA	0.049	0.2027	0.0323118	datp	cytoplasm	DNA	C10H12N5O12P3	10	12	5	12	3	0	487.151	ppi	312.202	63.2833	307.389	0.205874	0.0100878	0.0323118						0.0157407
	GC content for E. coli K-12mg1655 (50.8%)			0.2973	0.0473918	dctp	cytoplasm	DNA	C9H12N3O13P3	9	10	3	13	3	0	461.109	ppi	286.16	85.0754		0.276768	0.0135616	0.0473918						0.0218528
	GC content for E. coli K-12mg1655 (50.8%)			0.2973	0.0473918	dgtp	cytoplasm	DNA	C10H12N5O13P3	10	12	5	13	3	0	503.15	ppi	328.201	97.5742		0.317429	0.015554	0.0473918						0.0238452
	GC content for E. coli K-12mg1655 (50.8%)			0.2027	0.0323118	dttp	cytoplasm	DNA	C10H13N2O14P3	10	13	2	14	3	0	478.136	ppi	303.187	61.456		0.199929	0.00979653	0.0323118		0.159407	DNA	0.049		0.0154495	0.0768881	0.049
	NH pg. 98	RNA	0.122	0.2	0.0754071	ctp	cytoplasm	RNA	C9H12N3O14P3	9	12	3	14	3	0	479.124	ppi	304.175	60.835	323.577	0.188008	0.022937	0.0754071						0.0361294
	NH pg. 98			0.322222	0.121489	gtp	cytoplasm	RNA	C10H12N5O14P3	10	12	5	14	3	0	519.149	ppi	344.2	110.909		0.342759	0.0418166	0.121489						0.063071
	NH pg. 98			0.215873	0.0813918	utp	cytoplasm	RNA	C9H11N2O15P3	9	11	2	15	3	0	480.108	ppi	305.159	65.8756		0.203586	0.0248374	0.0813918						0.0390769
	NH pg. 98			0.261905	0.0987474	atp**	cytoplasm	RNA	C10H12N5O13P3	10	12	5	13	3	0	503.15	ppi	328.201	85.9574		0.265648	0.032409	0.0987474		0.377036	RNA	0.122		0.0496848	0.187962	0.122
	NH pg. 4	glycogen	0.03	1	0.185024	glycogen	cytoplasm	carbohydrate	C6H10O5	6	10	0	5	0	0	162.141	none	162.141	162.141	162.141	1	0.03	0.185024		0.185024	glycogen	0.03		0.03		0.03
	NH pg. 4, see 'murein' worksheet	murein	0.03	0.4	0.00645697	murein4p4p	periplasm	murein	C74H114N14O40	74	114	14	40	0	0	1839.78	none	1839.78	735.914	1858.46	0.395981	0.0118794	0.00645697						0.0118794
	NH pg. 4, see 'murein' worksheet			0.1	0.00161424	murein3p3p	periplasm	murein	C68H104N12O38	68	104	12	38	0	0	1697.63	none	1697.63	169.763		0.091346	0.00274038	0.00161424						0.00274038
	NH pg. 4, see 'murein' worksheet			0.405	0.00653769	murein4px4p	periplasm	murein	C74H112N14O39	74	112	14	39	0	0	1821.77	none	1821.77	737.816		0.397005	0.0119102	0.00653769						0.0119102
	NH pg. 4, see 'murein' worksheet			0.045	0.000726409	murein3px4p	periplasm	murein	C71H107N13O38	71	107	13	38	0	0	1750.69	none	1750.69	78.7811		0.0423906	0.00127172	0.000726409						0.00127172
	NH pg. 4, see 'murein' worksheet			0.05	0.000807122	murein4px4px4p	periplasm	murein	C111H167N21O58	111	167	21	58	0	0	2723.65	none	2723.65	136.182		0.0732771	0.00219831	0.000807122		0.0161424	murein	0.03		0.00219831		0.03
	NH pg. 4, and NH pg 1041 (essentially all laboratory strains of E. coli K-12 lack O-antigen, a rough phenotype), pg 15 NH in table	LPS	0.041	1	0.0132067	gm1lipa	extra-cellular face	LPS	C142H253N3O65P2	142	253	3	65	2	0	3104.49	none	3104.49	3104.49	3104.49	1	0.041	0.0132067		0.0132067	LPS	0.041		0.041		0.041
	see 'lipid' worksheet	lipid	0.149	0.0888525	0.018303	pe140	cytoplasm / periplasm	lipid	C33H66N1O8P1	33	66	1	8	1	0	635.864	none	635.864	56.4981	723.324	0.078109	0.0116382	0.018303						0.0116382
	see 'lipid' worksheet			0.268165	0.0552402	pe160	cytoplasm / periplasm	lipid	C37H74N1O8P2	37	74	1	8	1	0	691.972	none	691.972	185.562		0.256541	0.0382246	0.0552402						0.0382246
	see 'lipid' worksheet			0.392681	0.0808896	pe161	cytoplasm / periplasm	lipid	C37H70N1O8P1	37	70	1	8	1	0	687.94	none	687.94	270.141		0.373471	0.0556472	0.0808896						0.0556472
	see 'lipid' worksheet			0.0156889	0.0032318	pe181	cytoplasm / periplasm	lipid	C41H78N1O8P1	41	78	1	8	1	0	744.048	none	744.048	11.6733		0.0161384	0.00240462	0.0032318						0.00240462
	see 'lipid' worksheet			0.0213241	0.00439262	pg140	cytoplasm / periplasm	lipid	C34H66O10P1	34	66	0	10	1	0	665.866	none	665.866	14.199		0.0196302	0.0029249	0.00439262						0.0029249
	see 'lipid' worksheet			0.064358	0.0132573	pg160	cytoplasm / periplasm	lipid	C38H74O10P1	38	74	0	10	1	0	721.974	none	721.974	46.4648		0.0642379	0.00957144	0.0132573						0.00957144
	see 'lipid' worksheet			0.0942411	0.019413	pg161	cytoplasm / periplasm	lipid	C38H70O10P1	38	70	0	10	1	0	717.942	none	717.942	67.6596		0.0935399	0.0139374	0.019413						0.0139374
	see 'lipid' worksheet			0.00376524	0.000775614	pg181	cytoplasm / periplasm	lipid	C42H78O10P1	42	78	0	10	1	0	774.05	none	774.05	2.91448		0.00402929	0.000600364	0.000775614						0.000600364
	see 'lipid' worksheet			0.00592342	0.00122019	clpn140	periplasm	lipid	C65H124O17P2	65	124	0	17	2	0	1239.64	none	1239.64	7.3429		0.0101516	0.00151259	0.00122019						0.00151259
	see 'lipid' worksheet			0.0178774	0.00368263	clpn160	periplasm	lipid	C73H140O17P2	73	140	0	17	2	0	1351.85	none	1351.85	24.1676		0.0334119	0.00497838	0.00368263						0.00497838
	see 'lipid' worksheet			0.0261784	0.00539257	clpn161	periplasm	lipid	C73H132O17P2	73	132	0	17	2	0	1343.79	none	1343.79	35.1782		0.0486341	0.00724648	0.00539257						0.00724648
	see 'lipid' worksheet			0.00104591	0.000215451	clpn181	periplasm	lipid	C81H148O17P2	81	148	0	17	2	0	1456.01	none	1456.01	1.52285		0.00210535	0.000313697	0.000215451		0.206014	lipid	0.149		0.000313697		0.149
	NH pg. 21, see 'ion' worksheet	inorganic ions	0.01	0.758487	0.185792	k	cytoplasm	inorganic ions	K							38.9637	none	38.9637	29.5535	40.8246	0.723913	0.00723913	0.185792						0.00723913
	NH pg. 21, see 'ion' worksheet			0.0505658	0.0123861	nh4	cytoplasm	inorganic ions	H4N	0	4	1	0	0	0	18.039	none	18.039	0.912157		0.0223433	0.000223433	0.0123861						0.000223433
	NH pg. 21, see 'ion' worksheet			0.0337106	0.00825741	mg2	cytoplasm	inorganic ions	Mg							23.985	none	23.985	0.808548		0.0198054	0.000198054	0.00825741						0.000198054
	NH pg. 21, see 'ion' worksheet			0.0202263	0.00495444	ca2	cytoplasm	inorganic ions	Ca							39.9626	none	39.9626	0.808297		0.0197992	0.000197992	0.00495444						0.000197992
	NH pg. 21, see 'ion' worksheet			0.0564315	0.0138229	fe2	cytoplasm	inorganic ions	Fe							55.9349	none	55.9349	3.15649		0.0773182	0.000773182	0.0138229						0.000773182
	NH pg. 21, see 'ion' worksheet			0	0	fe3	cytoplasm	inorganic ions	Fe							55.9349	none	55.9349	0		0	0	0						0
	NH pg. 21, see 'ion' worksheet			0.00275415	0.00067463	cu2	cytoplasm	inorganic ions	Cu							63.546	none	63.546	0.175015		0.004287	4.287e-05	0.00067463						4.287e-05
	NH pg. 21, see 'ion' worksheet			0.00268673	0.000658115	mn2	cytoplasm	inorganic ions	Mn							54.938	none	54.938	0.147604		0.00361555	3.61555e-05	0.000658115						3.61555e-05
	NH pg. 21, see 'ion' worksheet			0.00132482	0.000324516	zn2	cytoplasm	inorganic ions	Zn							63.9291	none	63.9291	0.0846949		0.0020746	2.0746e-05	0.000324516						2.0746e-05
	NH pg. 21, see 'ion' worksheet			0.00125403	0.000307175	ni2	cytoplasm	inorganic ions	Ni							58.6934	none	58.6934	0.0736034		0.00180292	1.80292e-05	0.000307175						1.80292e-05
	NH pg. 21, see 'ion' worksheet			2.69684e-05	6.60592e-06	mobd	cytoplasm	inorganic ions	MoO4	0	0	0	4	0	0	159.956	none	159.956	0.00431376		0.000105666	1.05666e-06	6.60592e-06						1.05666e-06
	NH pg. 21, see 'ion' worksheet			9.77606e-05	2.39465e-05	cobalt2	cytoplasm	inorganic ions	Co							58.9332	none	58.9332	0.00576135		0.000141124	1.41124e-06	2.39465e-05						1.41124e-06
	NH pg. 21, see 'ion' worksheet			0.0202263	0.00495444	cl	cytoplasm	inorganic ions	Cl							34.9689	none	34.9689	0.707293		0.0173251	0.000173251	0.00495444						0.000173251
	NH pg. 21, see 'ion' worksheet			0.0168553	0.0041287	so4	cytoplasm	inorganic ions	O4S	0	0	0	4	0	1	96.062	none	96.062	1.61915		0.0396611	0.000396611	0.0041287						0.000396611
	NH pg. 21, see 'ion' worksheet			0.0168553	0.0041287	pi**	cytoplasm	inorganic ions	HO4P	0	1	0	4	1	0	95.978	none	95.978	1.61774		0.0396265	0.000396265	0.0041287						0.000396265
	see 'ion' worksheet			0.000101132	2.47722e-05	2fe2s	cytoplasm	inorganic ions	S2Fe2	0	0	0	0	0	2	176.002	none	176.002	0.0177994		0.000435995	4.35995e-06	2.47722e-05						4.35995e-06
	see 'ion' worksheet			0.00101132	0.000247722	4fe4s	cytoplasm	inorganic ions	S4Fe4	0	0	0	0	0	4	352.004	none	352.004	0.355987		0.00871991	8.71991e-05	0.000247722						8.71991e-05
	see 'ion' worksheet			0.000475319	0.000116429	bmocogdp	cytoplasm	inorganic ions	C40H44N20O27P4S4Mo	40	44	20	27	4	4	1585.02	none	1585.02	0.753392		0.0184544	0.000184544	0.000116429						0.000184544
	see 'ion' worksheet			2.69684e-05	6.60592e-06	mocogdp	cytoplasm	inorganic ions	C20H22N10O15P2S2Mo	20	22	10	15	2	2	864.491	none	864.491	0.023314		0.000571076	5.71076e-06	6.60592e-06						5.71076e-06		0.01
		soluble pool	0.00789734		0.0306828	ptrc	cytoplasm	polyamine	C4H14N2	4	14	2	0	0	0	90.17	none	90.17											0.00276667
					0.00606984	spmd	cytoplasm	polyamine	C7H22N3	7	22	3	0	0	0	148.274	none	148.274											0.0009
					0.000279167	accoa	cytoplasm	cofactor	C23H34N7O17P3S	23	34	7	17	3	1	805.545	none	805.545											0.000224881
					0.0001675	coa	cytoplasm	cofactor	C21H32N7O16P3S	21	32	7	16	3	1	763.508	none	763.508											0.000127888
					9.82667e-05	succoa	cytoplasm	cofactor	C25H35N7O19P3S	25	35	7	19	3	1	862.573	none	862.573											8.47622e-05
					3.12667e-05	malcoa	cytoplasm	cofactor	C24H33N7O19P3S	24	33	7	19	3	1	848.546	none	848.546											2.65312e-05
					0.00178667	nad	cytoplasm	cofactor	C21H26N7O14P2	21	26	7	14	2	0	662.422	none	662.422											0.00118353
					4.46667e-05	nadh	cytoplasm	cofactor	C21H27N7O14P2	21	27	7	14	2	0	663.43	none	663.43											2.96332e-05
					0.000111667	nadp	cytoplasm	cofactor	C21H25N7O17P3	21	25	7	17	3	0	740.385	none	740.385											8.26763e-05
					0.000335	nadph	cytoplasm	cofactor	C21H26N7O17P3	21	26	7	17	3	0	741.393	none	741.393											0.000248367
					0.000223333	fad	cytoplasm	cofactor	C27H31N9O15P2	27	31	9	15	2	0	783.541	none	783.541											0.000174991
					0.000223333	thf	cytoplasm	cofactor	C19H21N7O6	19	21	7	6	0	0	443.42	none	443.42											9.90305e-05
					0.000223333	mlthf	cytoplasm	cofactor	C20H21N7O6	20	21	7	6	0	0	455.431	none	455.431											0.000101713
					0.000223333	5mthf	cytoplasm	cofactor	C20H24N7O6	20	24	7	6	0	0	458.455	none	458.455											0.000102388
					0.000223333	thmpp	cytoplasm	cofactor	C12H16N4O7P2S	12	16	4	7	2	1	422.295	none	422.295											9.43126e-05
					0.000223333	2dmmql8	cytoplasm	cofactor	C50H72O2	50	72	0	2	0	0	705.124	none	705.124											0.000157478
					0.000223333	mql8	cytoplasm	cofactor	C51H74O2	51	74	0	2	0	0	719.151	none	719.151											0.00016061
					0.000223333	pydx5p	cytoplasm	cofactor	C8H8NO6P	8	8	1	6	1	0	245.127	none	245.127											5.4745e-05
					0.000223333	hemeO	cytoplasm	cofactor	C49H56FeN4O5	49	56	4	5	0	0	836.945	none	836.945											0.000186918
					0.000223333	pheme	cytoplasm	cofactor	C39H30FeN4O4	39	30	4	5	0	0	690.627	none	690.627											0.00015424
					0.000223333	sheme	cytoplasm	cofactor	C42H36FeN4O16	42	36	4	16	0	0	908.697	none	908.697											0.000202942
					0.000223333	adocbl	cytoplasm	cofactor	C72H100CoN18O17P	72	100	18	17	1	0	1579.61	none	1579.61											0.000352779
					5.53526e-05	udcpdp	cytoplasm	cofactor	C55H89O7P2	55	89	0	7	2	0	924.258	none	924.258											5.11601e-05
					0.000223333	10fthf	cytoplasm	cofactor	C20H21N7O7	20	21	7	7	0	0	471.43	none	471.43											0.000105286
					0.000223333	chor	cytoplasm	cofactor	C10H8O6	10	8	0	6	0	0	224.168	none	224.168											5.00642e-05
					0.000223333	amet	cytoplasm	cofactor	C15H23N6O5S	15	23	6	5	0	1	399.452	none	399.452											8.92109e-05
					0.000223333	ribflv	cytoplasm	cofactor	C17H20N4O6	17	20	4	6	0	0	376.369	none	376.369											8.40557e-05
					2e-06	btn	cytoplasm	cofactor	C10H15N2O3S	10	15	2	3	0	1	243.307	none	243.307											4.86614e-07		0.00789734
	maintenance			1	79.2	atp**	cytoplasm	maint	C10H12N5O13P5	10	12	5	13	3	0	503.15													39.8495
	maintenance			1	79.2	h2o**	cytoplasm	maint	H2O	0	2	0	1	0	0	18.015													1.42679
	RNA / maint				79.2987	atp**	cytoplasm
	AA difference / maint				74.0306	h2o**	cytoplasm
	Products
	maintenance			1	79.2	adp	cytoplasm	maint	C10H12N5O10P2	10	12	5	10	2	0	424.179													33.595
	maintenance			1	79.2	h	cytoplasm	maint	H	0	1	0	0	0	0	1.008													0.0798336
	maintenance			1	79.2	pi**	cytoplasm	maint	HO4P	0	1	0	4	1	0	95.978													7.60146
	sum of dNTPs				0.159407	ppi**	cytoplasm	sum of dNTPs	HO7P2	0	1	0	7	2	0	174.949													0.0278881
	sum of NTPs				0.377036	ppi**	cytoplasm	sum of NTPs	HO7P2	0	1	0	7	2	0	174.949													0.065962
	sum of AA				5.16939	h2o**	cytoplasm	sum of AA	H2O	0	2	0	1	0	0	18.015													0.0931266
	NT difference / dNT difference				0.536443	ppi**	cytoplasm	sum of NTPs and dNTPs	HO4P	0	1	0	4	1	0	95.978
	maintenance / ions				79.1959	pi**	cytoplasm	inorganic ions	HO4P	0	1	0	4	1	0	95.978
				Maintenance
				GAM (biosynthetic + other) =	79.2
				biosynthetic costs =	22.723
				unknown GAM costs =	56.477

## Sheet: biomass_core
G. metallireducens core Biomass Objective Function
	Notes	Macromolecule	overall wt%	composition (molar fraction)	mmol/gDW (Calc.)	metabolite	location	type	formula	C	H	N	O	P	S	MW (mg/mmol)	difference b/w metabolite and structual component	MWcorr (mg/mmol)	mg (if total 1 mmol)	total wt (mg)	composition (weight fraction)	g/gDW	mmol/gDW		total mmols material	class	final wt%		g/gDW	g/gDW	g/gDW		Reference
	Reactants																																NH	Neidhardt FC, Ingraham JL, Schaechter M (1990) Physiology of the bacterial cell : a molecular approach. Sinauer Associates, Sunderland, Mass.
	NH pg. 96	Protein	0.58	0.0960441	0.514221	ala-L	cytoplasm	AA	C3H7NO2	3	7	1	2	0	0	89.094	h2o	71.079	6.82672	108.33	0.0630178	0.0365503	0.514221						0.045814
	NH pg. 96			0.0553041	0.296099	arg-L	cytoplasm	AA	C6H15N4O2	6	15	4	2	0	0	175.212	h2o	157.197	8.69363		0.0802514	0.0465458	0.296099						0.05188
	NH pg. 96			0.0450699	0.241305	asn-L	cytoplasm	AA	C4H8N2O3	4	8	2	3	0	0	132.119	h2o	114.104	5.14265		0.0474721	0.0275338	0.241305						0.0318809
	NH pg. 96			0.0450699	0.241305	asp-L	cytoplasm	AA	C4H6NO4	4	6	1	4	0	0	132.095	h2o	114.08	5.14157		0.0474621	0.027528	0.241305						0.0318751
	NH pg. 96			0.0171226	0.0916747	cys-L	cytoplasm	AA	C3H7NO2S	3	7	1	2	0	1	121.16	h2o	103.145	1.76611		0.0163031	0.00945578	0.0916747						0.0111073
	NH pg. 96			0.0492029	0.263433	gln-L	cytoplasm	AA	C5H10N2O3	5	10	2	3	0	0	146.146	h2o	128.131	6.30442		0.0581964	0.0337539	0.263433						0.0384997
	NH pg. 96			0.0492029	0.263433	glu-L	cytoplasm	AA	C5H8NO4	5	8	1	4	0	0	146.122	h2o	128.107	6.30324		0.0581855	0.0337476	0.263433						0.0384934
	NH pg. 96			0.114544	0.613272	gly	cytoplasm	AA	C2H5NO2	2	5	1	2	0	0	75.067	h2o	57.052	6.53499		0.0603248	0.0349884	0.613272						0.0460365				consistency check		difference	scaling factor	scalin
	NH pg. 96			0.017713	0.0948359	his-L	cytoplasm	AA	C6H9N3O2	6	9	3	2	0	0	155.157	h2o	137.142	2.4292		0.0224241	0.013006	0.0948359						0.0147144				reactants	42.4702	0.999767	0.000233125
	NH pg. 96			0.05432	0.29083	ile-L	cytoplasm	AA	C6H13NO2	6	13	1	2	0	0	131.175	h2o	113.16	6.14685		0.0567419	0.0329103	0.29083						0.0381496				products	41.4704
	NH pg. 96			0.0842354	0.450997	leu-L	cytoplasm	AA	C6H13NO2	6	13	1	2	0	0	131.175	h2o	113.16	9.53208		0.0879911	0.0510348	0.450997						0.0591596				difference	0.999767
	NH pg. 96			0.0641606	0.343517	lys-L	cytoplasm	AA	C6H15N2O2	6	15	2	2	0	0	147.198	h2o	129.183	8.28846		0.0765112	0.0443765	0.343517						0.050565
	NH pg. 96			0.0287345	0.153845	met-L	cytoplasm	AA	C5H11NO2S	5	11	1	2	0	1	149.214	h2o	131.199	3.76994		0.0348005	0.0201843	0.153845						0.0229558				maintenance
	NH pg. 96			0.0346389	0.185457	phe-L	cytoplasm	AA	C9H11NO2	9	11	1	2	0	0	165.192	h2o	147.177	5.09804		0.0470603	0.027295	0.185457						0.030636				reactants	41.2763
	NH pg. 96			0.0413304	0.221284	pro-L	cytoplasm	AA	C5H9NO2	5	9	1	2	0	0	115.132	h2o	97.117	4.01389		0.0370524	0.0214904	0.221284						0.0254768				products	41.2763
	NH pg. 96			0.0403464	0.216015	ser-L	cytoplasm	AA	C3H7NO3	3	7	1	3	0	0	105.093	h2o	87.078	3.51328		0.0324313	0.0188102	0.216015						0.0227017				difference	0
	NH pg. 96			0.0474316	0.253949	thr-L	cytoplasm	AA	C4H9NO3	4	9	1	3	0	0	119.12	h2o	101.105	4.79557		0.0442682	0.0256756	0.253949						0.0302505
	NH pg. 96			0.0106278	0.0569015	trp-L	cytoplasm	AA	C11H12N2O2	11	12	2	2	0	0	204.229	h2o	186.214	1.97905		0.0182687	0.0105959	0.0569015						0.0116209
	NH pg. 96			0.0257823	0.138039	tyr-L	cytoplasm	AA	C9H11NO3	9	11	1	3	0	0	181.191	h2o	163.176	4.20706		0.0388356	0.0225246	0.138039						0.0250114
	NH pg. 96			0.0791183	0.4236	val-L	cytoplasm	AA	C5H11NO2	5	11	1	2	0	0	117.148	h2o	99.133	7.84323		0.0724013	0.0419928	0.4236		5.35401	Protein	0.58		0.0496239	0.676453	0.58
	GC content for E. coli K-12mg1655 (50.8%)	DNA	0.051	0.2027	0.0336307	datp	cytoplasm	DNA	C10H12N5O12P3	10	12	5	12	3	0	487.151	ppi	312.202	63.2833	307.389	0.205874	0.0104996	0.0336307						0.0163832
	GC content for E. coli K-12mg1655 (50.8%)			0.2973	0.0493261	dctp	cytoplasm	DNA	C9H12N3O13P3	9	10	3	13	3	0	461.109	ppi	286.16	85.0754		0.276768	0.0141152	0.0493261						0.0227447
	GC content for E. coli K-12mg1655 (50.8%)			0.2973	0.0493261	dgtp	cytoplasm	DNA	C10H12N5O13P3	10	12	5	13	3	0	503.15	ppi	328.201	97.5742		0.317429	0.0161889	0.0493261						0.0248184
	GC content for E. coli K-12mg1655 (50.8%)			0.2027	0.0336307	dttp	cytoplasm	DNA	C10H13N2O14P3	10	13	2	14	3	0	478.136	ppi	303.187	61.456		0.199929	0.0101964	0.0336307		0.165914	DNA	0.051		0.01608	0.0800264	0.051
	NH pg. 98	RNA	0.127	0.2	0.0784976	ctp	cytoplasm	RNA	C9H12N3O14P3	9	12	3	14	3	0	479.124	ppi	304.175	60.835	323.577	0.188008	0.023877	0.0784976						0.0376101
	NH pg. 98			0.322222	0.126468	gtp	cytoplasm	RNA	C10H12N5O14P3	10	12	5	14	3	0	519.149	ppi	344.2	110.909		0.342759	0.0435304	0.126468						0.0656559
	NH pg. 98			0.215873	0.0847275	utp	cytoplasm	RNA	C9H11N2O15P3	9	11	2	15	3	0	480.108	ppi	305.159	65.8756		0.203586	0.0258554	0.0847275						0.0406784
	NH pg. 98			0.261905	0.102794	atp**	cytoplasm	ARG	C10H12N5O13P3	10	12	5	13	3	0	503.15	ppi	328.201	85.9574		0.265648	0.0337372	0.102794		0.392488	RNA	0.127		0.051721	0.195665	0.127
	NH pg. 4, see 'murein' worksheet	murein	0.031	1	0.0163774	murein5px4p	periplasm	murein	C77H117N15O40	77	117	15	40	0	0	1892.85	none	1892.85	1892.85	1892.85	1	0.031	0.0163774		0.0163774	murein	0.031		0.031		0.031
	NH pg. 4, and NH pg 1041 (essentially all laboratory strains of E. coli K-12 lack O-antigen, a rough phenotype), pg 15 NH in table	LPS	0.043	1	0.0233691	kdo2lipid4	extra-cellular face	LPS	C84H148N2O37P2	84	148	2	37	2	0	1840.03	none	1840.03	1840.03	1840.03	1	0.043	0.0233691		0.0233691	LPS	0.043		0.043		0.043
	see 'lipid' worksheet	lipid	0.155	0.467	0.104933	pe160	cytoplasm / periplasm	lipid	C37H74N1O8P2	37	74	1	8	1	0	691.972	none	691.972	323.151	689.823	0.468455	0.0726105	0.104933						0.0726105
	see 'lipid' worksheet			0.533	0.119763	pe161	cytoplasm / periplasm	lipid	C37H70N1O8P1	37	70	1	8	1	0	687.94	none	687.94	366.672		0.531545	0.0823895	0.119763		0.224695	lipid	0.155		0.0823895		0.155
	NH pg. 21, see 'ion' worksheet	inorganic ions	0.01	0.758487	0.189285	k	cytoplasm	inorganic ions	K							38.9637	none	38.9637	29.5535	40.0712	0.737523	0.00737523	0.189285						0.00737523
	NH pg. 21, see 'ion' worksheet			0.0505658	0.012619	nh4	cytoplasm	inorganic ions	H4N	0	4	1	0	0	0	18.039	none	18.039	0.912157		0.0227634	0.000227634	0.012619						0.000227634
	NH pg. 21, see 'ion' worksheet			0.0337106	0.00841266	mg2	cytoplasm	inorganic ions	Mg							23.985	none	23.985	0.808548		0.0201778	0.000201778	0.00841266						0.000201778
	NH pg. 21, see 'ion' worksheet			0.0202263	0.00504759	ca2	cytoplasm	inorganic ions	Ca							39.9626	none	39.9626	0.808297		0.0201715	0.000201715	0.00504759						0.000201715
	NH pg. 21, see 'ion' worksheet			0.0564315	0.0140828	fe2	cytoplasm	inorganic ions	Fe							55.9349	none	55.9349	3.15649		0.0787719	0.000787719	0.0140828						0.000787719
	NH pg. 21, see 'ion' worksheet			0	0	fe3	cytoplasm	inorganic ions	Fe							55.9349	none	55.9349	0		0	0	0						0
	NH pg. 21, see 'ion' worksheet			0.00275415	0.000687314	cu2	cytoplasm	inorganic ions	Cu							63.546	none	63.546	0.175015		0.00436761	4.36761e-05	0.000687314						4.36761e-05
	NH pg. 21, see 'ion' worksheet			0.00268673	0.000670489	mn2	cytoplasm	inorganic ions	Mn							54.938	none	54.938	0.147604		0.00368353	3.68353e-05	0.000670489						3.68353e-05
	NH pg. 21, see 'ion' worksheet			0.00132482	0.000330617	zn2	cytoplasm	inorganic ions	Zn							63.9291	none	63.9291	0.0846949		0.00211361	2.11361e-05	0.000330617						2.11361e-05
	NH pg. 21, see 'ion' worksheet			0.00125403	0.000312951	ni2	cytoplasm	inorganic ions	Ni							58.6934	none	58.6934	0.0736034		0.00183681	1.83681e-05	0.000312951						1.83681e-05
	NH pg. 21, see 'ion' worksheet			2.69684e-05	6.73012e-06	mobd	cytoplasm	inorganic ions	MoO4	0	0	0	4	0	0	159.956	none	159.956	0.00431376		0.000107652	1.07652e-06	6.73012e-06						1.07652e-06
	NH pg. 21, see 'ion' worksheet			9.77606e-05	2.43967e-05	cobalt2	cytoplasm	inorganic ions	Co							58.9332	none	58.9332	0.00576135		0.000143778	1.43778e-06	2.43967e-05						1.43778e-06
	NH pg. 21, see 'ion' worksheet			0.0202263	0.00504759	cl	cytoplasm	inorganic ions	Cl							34.9689	none	34.9689	0.707293		0.0176509	0.000176509	0.00504759						0.000176509
	NH pg. 21, see 'ion' worksheet			0.0168553	0.00420633	so4	cytoplasm	inorganic ions	O4S	0	0	0	4	0	1	96.062	none	96.062	1.61915		0.0404068	0.000404068	0.00420633						0.000404068
	NH pg. 21, see 'ion' worksheet			0.0168553	0.00420633	pi**	cytoplasm	inorganic ions	HO4P	0	1	0	4	1	0	95.978	none	95.978	1.61774		0.0403715	0.000403715	0.00420633						0.000403715
	see 'ion' worksheet			0.000101132	2.5238e-05	2fe2s	cytoplasm	inorganic ions	S2Fe2	0	0	0	0	0	2	176.002	none	176.002	0.0177994		0.000444193	4.44193e-06	2.5238e-05						4.44193e-06
	see 'ion' worksheet			0.00101132	0.00025238	4fe4s	cytoplasm	inorganic ions	S4Fe4	0	0	0	0	0	4	352.004	none	352.004	0.355987		0.00888385	8.88385e-05	0.00025238						8.88385e-05
	see 'ion' worksheet			2.69684e-05	6.73012e-06	mocogdp	cytoplasm	inorganic ions	C20H22N10O15P2S2Mo	20	22	10	15	2	2	864.491	none	864.491	0.023314		0.000581813	5.81813e-06	6.73012e-06						5.81813e-06		0.01
		soluble pool	0.00276688		0.0001675	coa	cytoplasm	cofactor	C21H32N7O16P3S	21	32	7	16	3	1	763.508	none	763.508											0.000127888
					0.00178667	nad	cytoplasm	cofactor	C21H26N7O14P2	21	26	7	14	2	0	662.422	none	662.422											0.00118353
					0.000111667	nadp	cytoplasm	cofactor	C21H25N7O17P3	21	25	7	17	3	0	740.385	none	740.385											8.26763e-05
					0.000223333	fad	cytoplasm	cofactor	C27H31N9O15P2	27	31	9	15	2	0	783.541	none	783.541											0.000174991
					0.000223333	thf	cytoplasm	cofactor	C19H21N7O6	19	21	7	6	0	0	443.42	none	443.42											9.90305e-05
					0.000223333	mlthf	cytoplasm	cofactor	C20H21N7O6	20	21	7	6	0	0	455.431	none	455.431											0.000101713
					0.000223333	thmpp	cytoplasm	cofactor	C12H16N4O7P2S	12	16	4	7	2	1	422.295	none	422.295											9.43126e-05
					0.000223333	mql8	cytoplasm	cofactor	C51H74O2	51	74	0	2	0	0	719.151	none	719.151											0.00016061
					0.000223333	pydx5p	cytoplasm	cofactor	C8H8NO6P	8	8	1	6	1	0	245.127	none	245.127											5.4745e-05
					0.000223333	pheme	cytoplasm	cofactor	C39H30FeN4O4	39	30	4	5	0	0	690.627	none	690.627											0.00015424
					0.000223333	sheme	cytoplasm	cofactor	C42H36FeN4O16	42	36	4	16	0	0	908.697	none	908.697											0.000202942
					5.53526e-05	udcpdp	cytoplasm	cofactor	C55H89O7P2	55	89	0	7	2	0	924.258	none	924.258											5.11601e-05
					0.000223333	10fthf	cytoplasm	cofactor	C20H21N7O7	20	21	7	7	0	0	471.43	none	471.43											0.000105286
					0.000223333	amet	cytoplasm	cofactor	C15H23N6O5S	15	23	6	5	0	1	399.452	none	399.452											8.92109e-05
					0.000223333	ribflv	cytoplasm	cofactor	C17H20N4O6	17	20	4	6	0	0	376.369	none	376.369											8.40557e-05
					2e-06	btn	cytoplasm	cofactor	C10H15N2O3S	10	15	2	3	0	1	243.307	none	243.307											4.86614e-07		0.00276688
	maintenance			1	79.2	atp**	cytoplasm	maint	C10H12N5O13P5	10	12	5	13	3	0	503.15													39.8495
	maintenance			1	79.2	h2o**	cytoplasm	maint	H2O	0	2	0	1	0	0	18.015													1.42679
	RNA / maint				79.3028	atp**	cytoplasm
	AA difference / maint				73.846	h2o**	cytoplasm
	Products
	maintenance			1	79.2	adp	cytoplasm	maint	C10H12N5O10P2	10	12	5	10	2	0	424.179													33.595
	maintenance			1	79.2	h	cytoplasm	maint	H	0	1	0	0	0	0	1.008													0.0798336
	maintenance			1	79.2	pi**	cytoplasm	maint	HO4P	0	1	0	4	1	0	95.978													7.60146
	sum of dNTPs				0.165914	ppi**	cytoplasm	sum of dNTPs	HO7P2	0	1	0	7	2	0	174.949													0.0290264
	sum of NTPs				0.392488	ppi**	cytoplasm	sum of NTPs	HO7P2	0	1	0	7	2	0	174.949													0.0686654
	sum of AA				5.35401	h2o**	cytoplasm	sum of AA	H2O	0	2	0	1	0	0	18.015													0.0964525
	NT difference / dNT difference				0.558401	ppi**	cytoplasm	sum of NTPs and dNTPs	HO4P	0	1	0	4	1	0	95.978
	maintenance / ions				79.1958	pi**	cytoplasm	inorganic ions	HO4P	0	1	0	4	1	0	95.978
				Maintenance
				GAM (biosynthetic + other) =	79.2
				biosynthetic costs =	22.723
				unknown GAM costs =	23.943

## Sheet: maintenance
	Maintenance Costs							Reference
								NH2	Neidhardt FC, Ingraham JL, Schaechter M (1990) Physiology of the bacterial cell : a molecular approach. Sinauer Associates, Sunderland, Mass.
	Quantifiable costs
	Macromolecular costs
		wt %	tot mmol	mmol ~P / mmol	Reference	total
	Protein	0.56	5.16939	4.32395	NH2	22.3522
	DNA	0.049	0.159407	1.36527	NH2	0.217634
	RNA	0.122	0.377036	0.406349	NH2	0.153208
					total	22.723

## Sheet: soluble_pool
	Soluable Pool									References
										NH	Neidhardt FC, Curtiss R (1996) Escherichia coli and Salmonella : cellular and molecular biology. ASM Press, Washington, D.C.
	Reference	molecules/cell	mmol/L	mg / gDW	abbrev.	g/mol	mmol/gDW	g/gDW		NH2	Neidhardt FC, Ingraham JL, Schaechter M (1990) Physiology of the bacterial cell : a molecular approach. Sinauer Associates, Sunderland, Mass.
	Ployamines									CCDB	CyberCell Database (http://redpoll.pharmacy.ualberta.ca/CCDB/)
	NH2 - pg. 14			2.76667	ptrc	90.17	0.0306828	0.00276667		Baba et al	Baba T, Ara T, Hasegawa M, Takai Y, Okumura Y, Baba M, Datsenko KA, Tomita M, Wanner BL, Mori H (2006) Construction of Escherichia coli K-12 in-frame, single-gene knockout mutants: the Keio collection. Mol Syst Biol 2: 2006.0008.
	NH2 - pg. 14			0.9	spmd	148.274	0.00606984	0.0009
	Vitamins and cofactors									text in red was idenfitied in E coli, but was deteremined not to be present in G. metallireducens.
	NH pg. 692 - average of values for different growth conditions		0.125		accoa	805.545	0.000279167	0.000224881
	NH pg. 692 - average of values for different growth conditions		0.075		coa	763.508	0.0001675	0.000127888
	NH pg. 692 - average of values for different growth conditions		0.044		succoa	862.573	9.82667e-05	8.47622e-05
	NH pg. 692 - average of values for different growth conditions		0.014		malcoa	848.546	3.12667e-05	2.65312e-05
	NH pg. 721		0.8		nad	662.422	0.00178667	0.00118353
	NH pg. 721		0.02		nadh	663.43	4.46667e-05	2.96332e-05
	NH pg. 721		0.05		nadp	740.385	0.000111667	8.26763e-05
	NH pg. 721		0.15		nadph	741.393	0.000335	0.000248367
	NH pg. 1028 - approximation from amount of lipid I and II in soluable pool	10000			udcpdp	924.258	5.53526e-05	5.11601e-05
	PMID: 20937134	250			btn	243.307	2e-06	4.86614e-07	* rounded up to 0.000002
			0.1		10fthf	471.43	0.000223333	0.000105286
			0.1		thf	443.42	0.000223333	9.90305e-05
			0.1		mlthf	455.431	0.000223333	0.000101713
			0.1		5mthf	458.455	0.000223333	0.000102388
			0.1		chor	224.168	0.000223333	5.00642e-05
			0.1		enter
			0.1		gthrd
			0.1		pydx5p	245.127	0.000223333	5.4745e-05
			0.1		amet	399.452	0.000223333	8.92109e-05
			0.1		thmpp	422.295	0.000223333	9.43126e-05
			0.1		adocbl	1579.61	0.000223333	0.000352779
			0.1		q8h2
			0.1		2dmmql8	705.124	0.000223333	0.000157478
			0.1		mql8	719.151	0.000223333	0.00016061
			0.1		hemeO	836.945	0.000223333	0.000186918
			0.1		pheme	690.627	0.000223333	0.00015424
			0.1		sheme	908.697	0.000223333	0.000202942
			0.1		ribflv	376.369	0.000223333	8.40557e-05
			0.1		fad	783.541	0.000223333	0.000174991
							Total	0.00789734
	Cell Property	Value	Reference
	Avogadro's number	6.022e+23
	Avearge Cell Aqueous Volume (L/cell)	6.7e-16	CCDB
	Average Dry Mass (gDW/cell)	3e-13	CCDB
	L/gDW	0.00223333	CCDB
	Average Wet Mass (gWW/cell)	9.5e-13	NH2 - pg.8
	Average Dry Mass (gDW/cell)	2.9e-13	NH2 - pg.8
	Major vitamins, cofactors and prosthetic groups in E. coli
	Identified by 'GO cellular process' (http://www.godatabase.org):
	GO functional category	major metabolite	met. considered:	met. considered:	met. considered:	met. considered:
	10-formyltetrahydrofolate biosynthesis	10-formyltetrahydrofolate	10fthf
	folic acid biosynthesis	folic acid	thf	mlthf	5mthf
	biotin biosynthesis	biotin	in network, but can not be synthesized (see supplementary material)
	chorismate biosynthesis	chorismate	chor
	coenzyme A biosynthesis	coenzyme A (pantothenate)	accoa	coa	succoa	malcoa
	enterobactin biosynthesis	enterobactin	enter
	glutathione biosynthesis	glutathione	gthrd
	lipoate biosynthesis	lipoate	not in network-biosynthetic pathway not sufficiently characterized
	Mo-molybdopterin cofactor biosynthesis	molybdopterin	not in network-biosynthetic pathway not sufficiently characterized
	nicotinamide adenine dinucleotide biosynthesis	nicotinamide adenine dinucleotide (pyridine nucleotides)	nad	nadh	nadp	nadph
	pyridoxine biosynthesis	pyridoxal 5-phosphate	pydx5p
	S-adenosylmethionine biosynthesis	S-adenosylmethionine	amet
	thiamine biosynthesis	thiamine diphosphate	thmpp
	vitamin B12 biosynthesis	vitamin B12	adocbl
	Identified by major biosynthtic product (NH text):
	quinones	quinones	q8h2	2dmmql	mql8
	heme	heme	hemeO	protoheme	sheme
	riboflavin (flavin nucleotides)	riboflavin	ribflv	fad
	Identified from essentiality data (Baba et al):
	Undecaprenyl pyrophosphate	undecaprenyl pyrophosphate	udcpdp

## Sheet: ion
	Ion composition									Reference
										CCDB	CyberCell Database (http://redpoll.pharmacy.ualberta.ca/CCDB/)
	Reference	Type	Concentration (CCDB)	concentration (mM)	species	molar fraction				NH	Neidhardt FC, Curtiss R (1996) Escherichia coli and Salmonella : cellular and molecular biology. ASM Press, Washington, D.C.
	NH2 - pg. 21	Number of K ions	90,000,000 (200-250 mM)	225	k	0.758487				NH2	Neidhardt FC, Ingraham JL, Schaechter M (1990) Physiology of the bacterial cell : a molecular approach. Sinauer Associates, Sunderland, Mass.
	NH2 - pg. 21	Number of Fe ions	7,000,000 (18 mM)	7.74	fe2	0.0564315	adjusted for Fe in Fe-S clusters, combined with fe3			Cvetkovic	Cvetkovic et al. Microbial metalloproteomes are largely uncharactertized. Nature 466(7307): 779-82. Aug 5 2010. (PMID: 20639861)
	NH2 - pg. 21			9	fe3
	NH2 - pg. 21	Number of Mg ions	4,000,000 (10 mM)	10	mg2	0.0337106
	NH2 - pg. 21	Number of Cl ions	2,400,000 (6 mM)	6	cl	0.0202263
	NH2 - pg. 21	Number of Ca ions	2,300,000 (6 mM)	6	ca2	0.0202263
	NH2 - pg. 21	Number of Na ions	2,000,000 (5 mM)	5	na	0.0168553
	NH2 - pg. 21	Number of PO4 ions	2,000,000 (5 mM)	5	pi**	0.0168553
	Cvetkovic	Percentage of Cu	0.0395	0.817	cu2	0.00275415
	Cvetkovic	Percentage of Mn	0.0385	0.797	mn2	0.00268673
	Cvetkovic	Percentage of Zn	0.019	0.393	zn2	0.00132482
	Cvetkovic	Percentage of Ni	0.018	0.372	ni2	0.00125403
	Cvetkovic	Percentage of Mo	0.008	0.008	mobd	2.69684e-05	adjusted for moco
	Cvetkovic	Percentage of Co	0.0014	0.029	cobalt2	9.77606e-05
	NH2 - pg. 21		assumed to be second most abundant cation (pg 1091 NH)	15	nh4	0.0505658
	NH2 - pg. 21		assumed approx same as phosphate	5	so4	0.0168553
		Number of [2Fe-2S] clusters	11,750 (0.03 mM)	0.03	2fe2s	0.000101132
		Number of [4Fe-4S] clusters	105,750 (0.3 mM)	0.3	4fe4s	0.00101132
		percentage of total Mo	0.85	0.141	bmocogdp	0.000475319
		percentage of total Mo	0.05	0.008	mocogdp	2.69684e-05
		percentage of total Mo	0.05	0.008	mococdp	2.69684e-05
			total	296.643
	Cvetkovic metalloproteome paper (20639861)
	metal ion	percentage	concentration (mM)	other numbers:
	Fe	86.98	18	3.5 uMol/g protein (PMID 1804764)	* matches Neidhardt number
	Cu	3.95	0.817429
	Mn	3.85	0.796735
	Zn	1.9	0.393194
	Ni	1.8	0.372499
	Mo	0.8	0.165555	1 uM (EcoSal module 3.6.3.13)
	V	0.4
	Co	0.14	0.0289722
	As	0.1
	Pb	0.04
	Cd	0.03
	U	0.01
	K	N/A
	Mg	N/A
	Cl	N/A
	Ca	N/A
	Na	N/A
	PO4	N/A
	NH4	N/A
	SO4	N/A
	* concentrations based on 18 mM Fe as 86.98% of total metal ion content
	Fe-S cluster calculations
	NH ch. 3	Number of proteins per cell	2350000
	PMID: 16547473	Number of Fe-S clusters per cell	117500	5% of all proteins estimated to have Fe-S clusters, 90% of those are [4Fe-4S]
		[4Fe-4S]	105750	0.262099	mM
		[2Fe-2S]	11750	0.0291221	mM
	Molybdenum cofactor calculations
	bmocogdp is primary form of molybdenum cofactor, assume 85%, 5% each for other forms
	bmocogdp	0.140722
	mocogdp	0.00827777
	mococdp	0.00827777
	mobd	0.00827777

## Sheet: murein
	Murein composition								References
									Schiffer et al	Schiffer G, Holtje JV (1999) Cloning and characterization of PBP 1C, a third member of the multimodular class A penicillin-binding proteins of Escherichia coli. J Biol Chem 274: 32031-32039.	PMID: 10542235
	crosslinked composition:	monomers	dimers	trimers	References				NH	NH -pg. 49	Neidhardt FC, Curtiss R (1996) Escherichia coli and Salmonella : cellular and molecular biology. ASM Press, Washington, D.C.
	mol % in sacculus:	0.5	0.45	0.05	Glauner et al, Schiffer et al, NH				Glauner et al	Glauner B, Holtje JV, Schwarz U (1988) The composition of the murein of Escherichia coli. J Biol Chem 263: 10088-10095.	PMID: 3292521
	peptide length composition					overall mol % (metabolite)	compound name
	uncrosslinked 4p	0.8	0	0	Glauner et al, Schiffer et al	0.4	murein4p4p
	uncrosslinked 3p	0.2	0	0	Glauner et al, Schiffer et al	0.1	murein3p3p
	4p->4p *	0	0.9	0	Glauner et al, Schiffer et al	0.405	murein4px4p
	3p->4p *	0	0.1	0	Glauner et al, Schiffer et al	0.045	murein4px3p
	4p->4p->4p *	0	0	1	Glauner et al	0.05	murein4px4px4p
	* all A2pm -> Ala crosslinked
	4p = 4-peptide
	3p = 3-peptide
	Note: Under certain conditions an appreciable amount of the sacculus can be 3p -> 3p crosslinked

## Sheet: lipids
	Lipid composition									References
										NH2	Neidhardt FC, Ingraham JL, Schaechter M (1990) Physiology of the bacterial cell : a molecular approach. Sinauer Associates, Sunderland, Mass.
	lipid composition:	-ethanolamine (pe)	-glycerol (pg)	cardiolipin (clpn)	References					NH	Neidhardt FC, Curtiss R (1996) Escherichia coli and Salmonella : cellular and molecular biology. ASM Press, Washington, D.C.
		0.75	0.18	0.05	NH2						Notes in NH
	mol fraction:	0.76531	0.18367	0.05102							Phopspholipds of log-phase Ec grown at 37C contain about 45% 16:0, 35% 16:1, and 18% 18:1. In most bacteria, Phosphatidylserine is a minor membrane lipid, although it is important as an intermediate in phosphatidylethanolamine biosynthesis. (http://lipidlibrary.aocs.org/lipids/ps/index.htm)	76% pe, 20% pg, cardiolipin and other
											the cytoplasmic membrane contains 65 - 75% of the cellular phospholipds, the remainder being in the innter leaflet of the outer membrane.
	acyl chain length composition	mol fraction	mol fraction	mol fraction		Reference	Ref Value	Normalized Value			the inner leaflet of the outer membrane is composed of almost entirely phosphatidylethanolamine
	14:0	0.1161	0.1161	0.1161		PMID: 18846396	0.1133	0.11605
	16:0	0.3504	0.3504	0.3504		PMID: 18846397	0.3421	0.350405		PMID: 18846396	J Ind Microbiol Biotechnol. 2009 Feb;36(2):205-9. Polar lipid fatty acids, LPS-hydroxy fatty acids, and respiratory quinones of three Geobacter strains, and variation with electron acceptor. Hedrick DB, Peacock AD, Lovley DR, Woodard TL, Nevin KP, Long PE, White DC.
	16:1	0.5131	0.5131	0.5131		PMID: 18846398	0.5009	0.51306
	18:1	0.0205	0.0205	0.0205		PMID: 18846399	0.02	0.0204855
							0.9763
	acyl-chain length abbrev.	pe	pg	clpn		total
	14:0	0.0888525	0.0213241	0.00592342		0.1161
	16:0	0.268165	0.064358	0.0178774		0.3504
	16:1	0.392681	0.0942411	0.0261784		0.5131
	18:1	0.0156889	0.00376524	0.00104591		0.0205
	total:	0.765387	0.183688	0.0510251
	fraction of each metabolite in the designated compartment
		pe	pg	clpn
	cytoplasm	0.28	0.538462	0
	periplasm	0.72	0.461538	1
				molecular makeup of the phospholipid composition
	cellular location	% of total phospholipids	% LPS	pe	pg	clpn	% of total phospholipids
	IM - cytoplasmic face	0.35	0	0.175	0.175	0	0.35
	IM - periplasmic face	0.35	0	0.15	0.15	0.05	0.35
	OM - periplasmic face	0.3	0	0.3	0	0	0.3
	OM - extracellulat face	0	1	0	0	0	0
	total	1	1	0.625	0.325	0.05	1

## Sheet: DNA
	DNA composition in G. metallireducens
			Number of G+C bases
	chromosome	3997420	0.5949
	plasmid	13762	0.52
	total	4011182	0.594643

## Sheet: macromolecular
	Analysis of Macromolecular content for G. metallireducens
	Macromolecule	weight %	weight % reference	molar breakdown	adopted Geobacter measurements	full profile breakdown (from E coli)	adopted measurements	adopted scaled meadurements
	Protein	0.46	PMID: 16461711	assumed - E. coli	0.46	0.55	0.46	0.560365
	DNA	0.04	PMID: 16461712	PMID: 19473543	0.04	0.031	0.04	0.0487274
	RNA	0.1	PMID: 16461713	assumed - E. coli	0.1	0.205	0.1	0.121818
	Lipid	0.15	PMID: 16461714	PMID: 18846396	0.15	0.091	0.1222	0.148862
	glycogen		assumed - E. coli, total carbohyrates measured in PMID: 16461711, but breakdown was not presented.	assumed - E. coli		0.025	0.025	0.0304546
	LPS		assumed - E. coli	assumed - E. coli		0.034	0.034	0.0414183
	murein		assumed - E. coli	assumed - E. coli		0.025	0.025	0.0304546
	ions / cofactors / mets		assumed - E. coli	assumed - E. coli		0.039	0.0179	0.0179
	total	0.75			0.75	1	0.8062	1
	Lipid
	The lipids measured in Geobacter sulfurreducens for the 2006 metabolic recontruction (PMID: 16461711) was total lipids.
	The breakdown of lipids between LPS and glycerophospholipds in E coli, from Neidhardt book was used to determine membrane lipids.
	This value was not used for LPS as the sugar molecular weight was not given.
	Total Lipid			Table 1. Ch 3 - NH
			lipid chains per molecule	molecules in cell	total chains	molar fraction
	LPS	OM OL	7	1430000	10010000	0.185336
	Lipid	IM / OM IL	2	22000000	44000000	0.814664
				total	54010000
	Ch 3. Chemical composition of Escherichia coli. In: F. C. Neidhardt, Editor, Escherichia coli and Salmonella typhimurium, Cellular and Molecular Biology

[truncated: 2 more sheets: BOF_lists, functional_testing]
